# Supplementary material for: A Cd-based MOF: iodine capture and enhanced efficiency of perovskite solar cells
Source: Royal Society of Chemistry journal article supplement (doi:10.1039/d4ra05219f), 2024-01-01
Supplement: d4ra05219f1.pdf [file d4ra05219f1.pdf]

## ***Supporting Information***

### **A Cd-based MOF : Iodine Capture and Enhanced Efficiency of Perovskite Solar Cells**

Yaxin Hou<sup>a,b</sup>, Yang Liu<sup>a</sup>, Juan Chai<sup>\*a</sup>

<sup>a</sup>Institute of Fire Safety Materials, School of Materials Science and Engineering, NingboTech University, Ningbo, 315100, P. R. China.

Email: [chaijuan@nbt.edu.cn](mailto:chaijuan@nbt.edu.cn)

<sup>b</sup>Minhang Crosspoint Academy at Shanghai Wenqi Middle School, Shanghai, 200240, P. R. China.

## Supporting Information

### Table of Contents

---

|                                                                                                                         |        |
|-------------------------------------------------------------------------------------------------------------------------|--------|
| 1. Powder X-ray diffraction patterns of Cd-MOF. (Fig. S1)                                                               | S3     |
| 2. FT-IR spectrum of Cd-MOF. (Fig. S2)                                                                                  | S3     |
| 3. SEM image of Cd-MOF. (Fig. S3)                                                                                       | S4     |
| 4. TGA curve of Cd-MOF measured in air atmosphere. (Fig. S4)                                                            | S4     |
| 5. Binuclear $[\text{Cd}_2\text{O}_2(\text{L})_2(\text{COO})_2]$ cluster of Cd-MOF. (Fig. S5)                           | S5     |
| 6. 3D supramolecular structure of Cd-MOF. (Fig. S6)                                                                     | S5     |
| 7. Calibration plot of iodine in a cyclohexane solution via a UV-vis spectrum. (Fig. S7)                                | S6     |
| 8. Adsorption amounts of MOF toward iodine in a cyclohexane solution of iodine when 40 mg of Cd-MOF is added. (Fig. S8) | S6     |
| 9. The image of the sample after $\text{I}_2$ adsorption. (Fig. S9)                                                     | S7     |
| 10. UV-vis spectra for temporal evolution of absorbance for the $\text{I}_2$ - released process in EtOH. (Fig. S10)     | S7     |
| 11. Crystal and structure refinement data for Cd-MOF. (Table S1)                                                        | S8     |
| 12. Selected bond lengths [ $\text{\AA}$ ] and angles [ $^\circ$ ] for Cd-MOF. (Table S2)                               | S9     |
| 13. EIS measurements of PSCs without and with Cd-MOF treatment. (Fig. S11)                                              | S9     |
| 14. Comparisons of device PCE between our PSCs and reported PSCs with MOF treatments (Table S3).                        | S10    |
| 15. Comparison of $\text{I}_2$ adsorption capacity of MOFs (Table S4).                                                  | S10-11 |

---

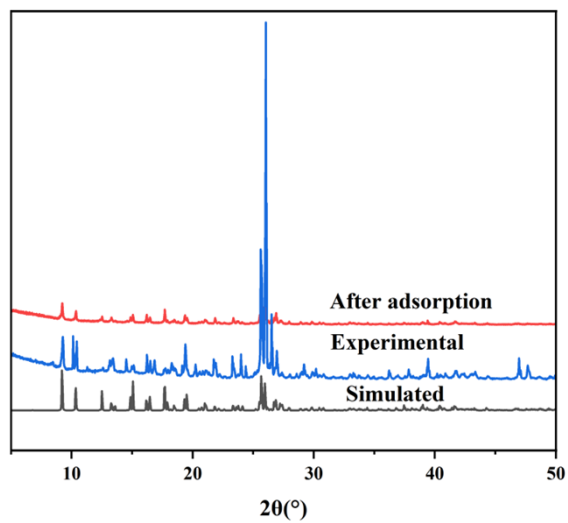

**Fig. S1** Powder X-ray diffraction patterns of Cd-MOF.

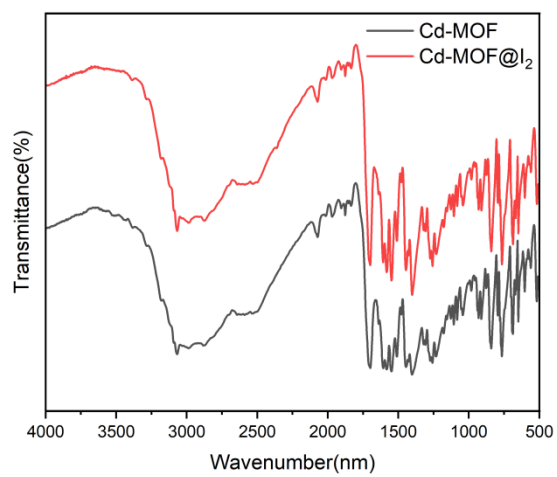

**Fig. S2** FT-IR spectrum of Cd-MOF.

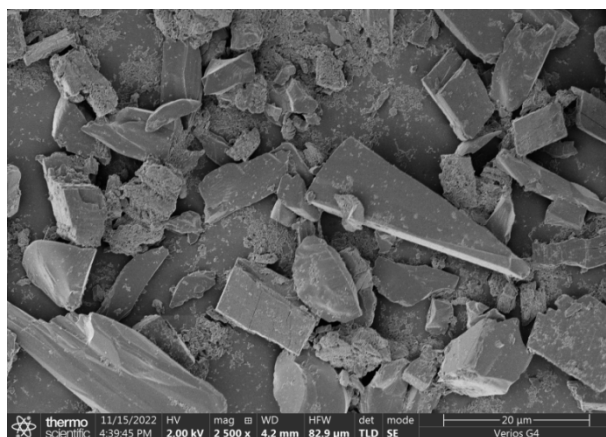

**Fig. S3** SEM image of Cd-MOF.

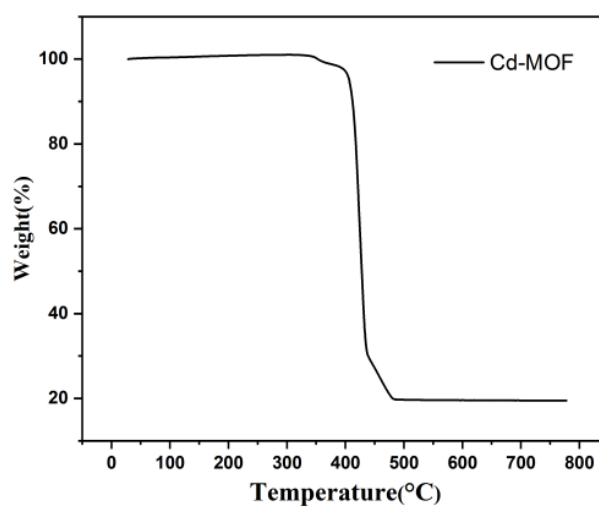

**Fig. S4** TGA curve of Cd-MOF measured in air atmosphere.

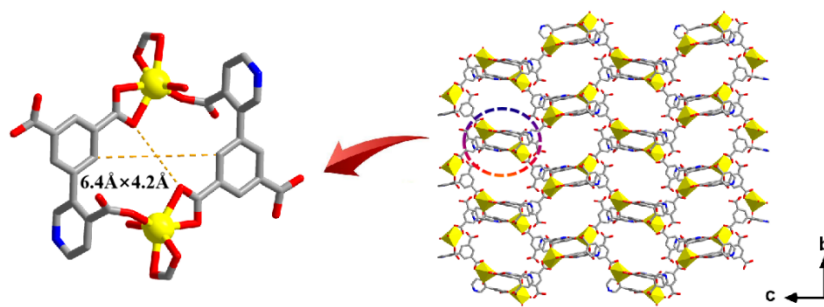

**Fig. S5** Binuclear  $[\text{Cd}_2\text{O}_2(\text{L})_2(\text{COO})_2]$  cluster of Cd-MOF .

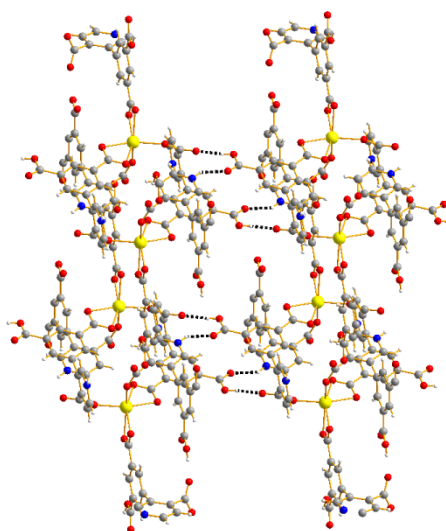

**Fig. S6** hydrogen bonds of Cd-MOF.

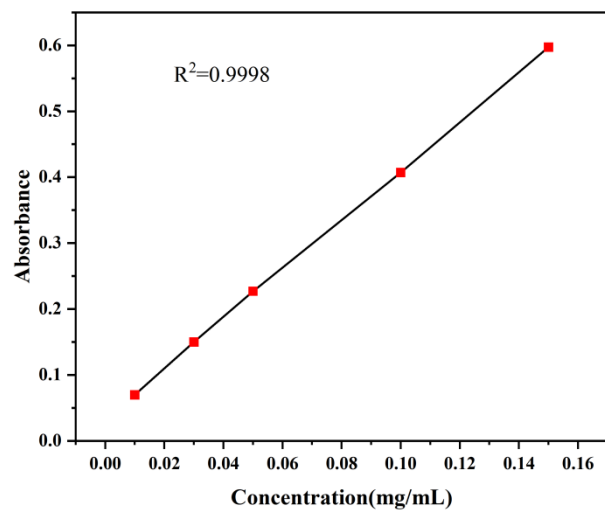

**Fig. S7** Calibration plot of iodine in a cyclohexane solution via a UV-vis spectrum.

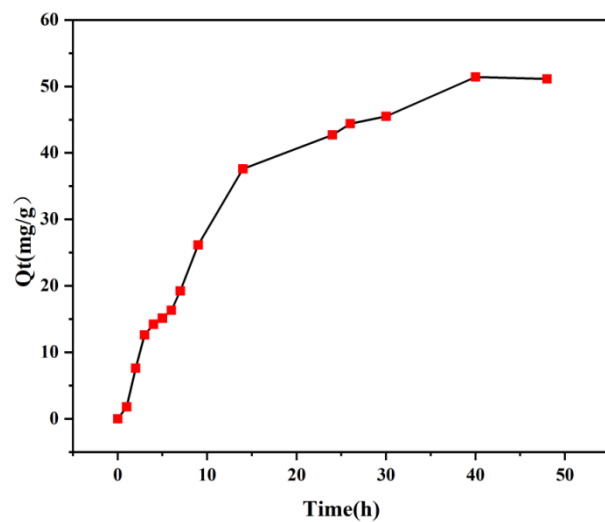

**Fig. S8** Adsorption amounts of MOF toward iodine in a cyclohexane solution of iodine when 40 mg of Cd-MOF is added.

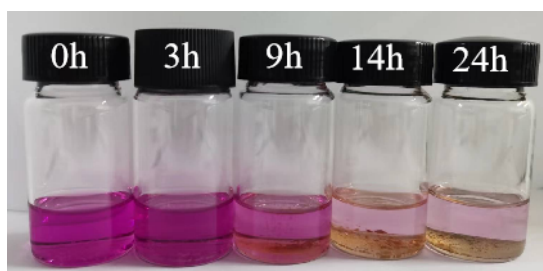

**Fig. S9** The image of the sample after I<sub>2</sub> adsorption.

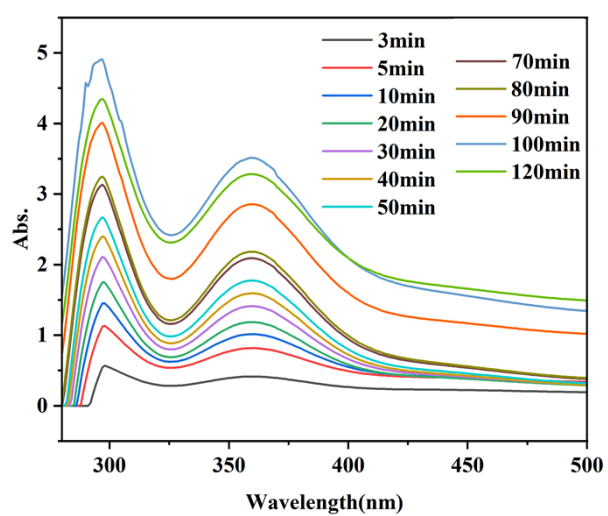

**Fig. S10** UV-vis spectra for temporal evolution of absorbance for the I<sub>2</sub> -released process in EtOH.

**Table S1** Crystal and structure refinement data for Cd-MOF

| MOFs                   | Cd-MOF                    |
|------------------------|---------------------------|
| chemical formula       | $C_{28}H_{16}CdN_2O_{12}$ |
| fw                     | 684.83                    |
| cryst system           | monoclinic                |
| space group            | $C2/c$                    |
| a/Å                    | 13.8767(4)                |
| b/Å                    | 13.7096(4)                |
| c/Å                    | 26.8754(8)                |
| $\alpha$ /deg          | 90                        |
| $\beta$ /deg           | 103.797(3)                |
| $\gamma$ /deg          | 90                        |
| $V/\text{Å}^3$         | 4965.4                    |
| T/K                    | 299                       |
| Z                      | 8                         |
| $D_c/\text{g cm}^{-3}$ | 1.832                     |
| $\mu/\text{mm}^{-1}$   | 0.957                     |
| F(000)                 | 2736.0                    |
|                        | $-18 \leq h \leq 17$      |
| index ranges           | $-18 \leq k \leq 17$      |
|                        | $-35 \leq l \leq 34$      |
| $R_{\text{int}}$       | 0.0646                    |
| GOF on $F^2$           | 1.062                     |
| $R_1[I > 2\sigma(I)]$  | 0.0378                    |
| $wR_2[I > 2\sigma(I)]$ | 0.1033                    |
| CCDC No.               | 2371872                   |

$$^a R_1 = \frac{\sum |F_o| - |F_c|}{\sum |F_o|}, \quad ^b wR_2 = \frac{\sum [w(F_o^2 - F_c^2)^2]}{\sum [w(F_o^2)^2]}^{1/2}$$



**Table S2** Selected bond lengths [ $\text{\AA}$ ] and angles [ $^\circ$ ] for Cd-MOF

|                  |           |                  |           |
|------------------|-----------|------------------|-----------|
| Cd(1)-O(10)      | 2.324(2)  | Cd(1)-O(7)       | 2.217(2)  |
| Cd(1)-O(5)       | 2.308(2)  | Cd(1)-O(9)       | 2.333(2)  |
| Cd(1)-O(1)       | 2.243(2)  | Cd(1)-O(6)       | 2.361(2)  |
| O(10)-Cd(1)-O(9) | 56.27(8)  | O(10)-Cd(1)-O(6) | 102.33(9) |
| O(7)-Cd(1)-O(10) | 148.84(8) | O(7)-Cd(1)-O(5)  | 88.11(8)  |
| O(7)-Cd(1)-O(9)  | 94.10(8)  | O(7)-Cd(1)-O(1)  | 95.19(8)  |
| O(7)-Cd(1)-O(6)  | 105.25(9) | O(5)-Cd(1)-O(10) | 95.42(8)  |
| O(5)-Cd(1)-O(9)  | 114.26(8) | O(5)-Cd(1)-O(6)  | 56.18(8)  |
| O(9)-Cd(1)-O(6)  | 157.44(9) | O(1)-Cd(1)-O(10) | 98.93(8)  |
| O(1)-Cd(1)-O(5)  | 145.72(8) | O(1)-Cd(1)-O(9)  | 99.57(9)  |
| O(1)-Cd(1)-O(6)  | 90.26(8)  |                  |           |

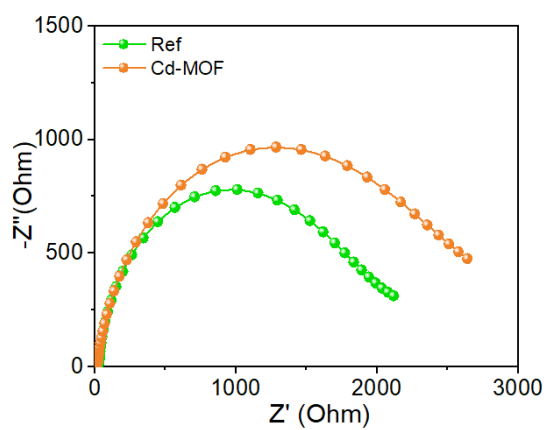**Fig. S11** EIS measurements of PSCs without and with Cd-MOF treatment.

**Table S3.** Comparisons of device PCE between our PSCs and reported PSCs with MOF treatments.

| PCE (%) | $J_{sc}$<br>(mA/cm <sup>2</sup> ) | $V_{oc}$ (V) | FF (%) | ref      |
|---------|-----------------------------------|--------------|--------|----------|
| 23.71   | 25.16                             | 1.179        | 79.90  | Our work |
| 18.10   | 22.1                              | 1.11         | 73.9   | 1        |
| 12.0    | 23.04                             | 0.93         | 60     | 2        |
| 22.16   | 23.71                             | 1.14         | 82     | 3        |
| 20.24   | 22.85                             | 1.12         | 79.1   | 4        |

Ref:

1. Y.-N. Zhang, B. Li, L. Fu, Q. Li, L.-W. Yin, *Electrochim. Acta*, 2020, **330**, 135280.
2. T.-H. Chang, C.-W. Kung, H.-W. Chen, T.-Y. Huang, S.-Y. Kao, H.-C. Lu, M.-H. Lee, K.M. Boopathi, C.-W. Chu, K.-C. Ho, *Adv. Mater.*, 2015, **27**, 7229-7235.
3. J. Dou, C. Zhu, H. Wang, Y. Han, S. Ma, X.X. Niu, N.X. Li, C.B. Shi, Z.W. Qiu, H.P. Zhou, Y. Bai, Q. Chen, *Adv. Mater.*, 2021, **33**, 2102947.
4. L.Y. Lou, L. Wan, Z.S. Wang, *ACS Appl. Mater. Interfaces*, 2023, **15**, 37059-37068.

**Table S4** Comparison of I<sub>2</sub> adsorption capacity of MOFs

| MOF material                                                                                   | Solution media   | adsorption<br>capacity<br>(mg g <sup>-1</sup> ) | Ref.      |
|------------------------------------------------------------------------------------------------|------------------|-------------------------------------------------|-----------|
| Cd-MOF                                                                                         | Cyclohexane      | 51.4                                            | This work |
| IFMC-10                                                                                        | Hexane           | 40                                              | 1         |
| Th-TATAB                                                                                       | Cyclohexane      | 75                                              | 2         |
| {[Zn <sub>2</sub> ( $\alpha$ -bptc)(H <sub>2</sub> O) <sub>4</sub> ] $\cdot$ pra} <sub>n</sub> | Methanol         | 85                                              | 3         |
| MIL-125-NH <sub>2</sub> @chitosan                                                              | H <sub>2</sub> O | 19                                              | 4         |
| [Cd <sub>3</sub> (BTC) <sub>2</sub> (TIB) <sub>2</sub> ] <sub>n</sub>                          | Hexane           | 160                                             | 5         |

Ref.:

1. L. Chen, K. Tan, Y.Q. Lan, S.L. Li, K.Z. Shao, Z. M. Su, *Chem. Commun.*, 2012, **48**, 5919-5921.
2. N. Zhang, L. X. Sun, Y. H. Xing, F. Y. Bai, *Cryst. Growth Des.*, 2019, **19**, 5686-5695.
3. S.S. Feng, Y.T. Bai, J.L. Zhu, L.P. Lu, M.L. Zhu, *Spectrochim. Acta, Part A*, 2018, **205**, 139-145.
4. M. El-Shahat, A.E. Abdelhamid, R.M. Abdelhameed, *Carbohydr. Polym.*, 2020, **231**, 115742.
5. Y. Rachuri, K.K. Bisht, B. Parmar, E. Suresh, *J. Solid State Chem.*, 2015, **223**, 23-31.
